# Supplementary material
Source: PubMed Central journal article supplement (PMC4140186)
Supplement: NIHMS596071-supplement-01.pdf [file NIHMS596071-supplement-01.pdf]

eTable 1. Coding of Inpatient Admission and ED Visit Diagnoses & Birth Exclusions

| Admission/visit diagnosis                                           | ICD-9 Code                                                                                                  | Comments                                                                                                                                                                                                        |
|---------------------------------------------------------------------|-------------------------------------------------------------------------------------------------------------|-----------------------------------------------------------------------------------------------------------------------------------------------------------------------------------------------------------------|
| 1. All behavioral health                                            | All codes between 290.xx to 319.xx                                                                          | Primary diagnosis for Inpatient admissions or any diagnosis for emergency department visits                                                                                                                     |
| 2. Depression                                                       | 296.2, 296.3, 300.4, 311.XX, V79.0                                                                          | Primary diagnosis for Inpatient admissions or any diagnosis for emergency department visits                                                                                                                     |
| 3. Substance use disorder (SUD)                                     | 303.XX, 304.XX, 305.XX AND 292.xx                                                                           | Primary diagnosis for Inpatient admissions or any diagnosis for emergency department visits                                                                                                                     |
| 4. Psychoses                                                        | 293.81 and 293.82, 294.2x-294.9x, 295.xx, 297.xx, 298.xx, 296.8 and 296.9                                   | Primary diagnosis for Inpatient admissions or any diagnosis for emergency department visits                                                                                                                     |
| 5. SUD with any mental illness.                                     | Any code in #3 plus any code in #1 not in #3                                                                | Emergency department visits only                                                                                                                                                                                |
| 6. Multiple mental health, >1 diagnosis of mental illness (not SUD) | Any 2 or more codes in #1 but not in #3 (i.e. not SUDs)                                                     | Emergency department visits only                                                                                                                                                                                |
| 7. All other behavioral health                                      | All remaining diagnoses between 290.XX and 319.xx not coded above in #2-#4 (inpatient) or #2-#6 (emergency) | Diagnosis #s 2 through 7 are mutually exclusive. For inpatient admissions, the sum of admissions in #s 2,3,4,7 = admissions in #1. For emergency department visits, the sum of visits in #s 2-7 = visits in #1. |
| 8. Codes used to exclude birth related discharges                   | V22-V24, V27-V39                                                                                            |                                                                                                                                                                                                                 |
